# Supplementary material
Source: Royal Society of Chemistry journal article supplement (doi:10.1039/d6ta01791f)
Supplement: d6ta01791f1.pdf [file d6ta01791f1.pdf]

Supporting Information

**Enhancing bifunctional electrocatalytic performance of electrodeposited medium entropy alloy films by configurational entropy engineering**

Pratibha Kushwah, Pushpesh Pathak, Perumal Alagarsamy, and Ananthakrishnan Srinivasan\*

Department of Physics, Indian Institute of Technology Guwahati, Guwahati,

Assam – 781039, India.

\*[asrini@iitg.ac.in](mailto:asrini@iitg.ac.in)

**1. Experimental section**

**Electrodeposition**

Co-Fe-Sn and Co-Fe-Ni-Sn medium entropy alloy (MEA) films were electrodeposited on 10 × 10 mm<sup>2</sup> Cu substrates using a prepared electrolyte. The electrolyte was formulated by dissolving the calculated amounts of metal salt precursors and additives in 250 mL of deionized water. The concentrations of the metal salts and additives employed for the deposition of the alloy films are summarized in Table S1.

Table S1. Concentration of metal salts and additives used to prepare the alloy films.

| Chemicals                            | Film composition |          |          |           |           |
|--------------------------------------|------------------|----------|----------|-----------|-----------|
|                                      | CFS              | CFNS-1   | CFNS-2   | CFNS-3    | CFNS-4    |
| Ascorbic acid                        | 1.0000 g         | 1.0000 g | 1.0000 g | 1.0000 g  | 1.0000 g  |
| CoSO <sub>4</sub> .7H <sub>2</sub> O | 5.1306 g         | 4.2465 g | 3.8308 g | 2.6014 g  | 3.0000 g  |
| FeSO <sub>4</sub> .7H <sub>2</sub> O | 4.5395 g         | 2.9266 g | 2.9266 g | 2.9266 g  | 2.9266 g  |
| NiSO <sub>4</sub> .6H <sub>2</sub> O | 0 g              | 6.0000 g | 8.0000 g | 13.7500 g | 13.7500 g |
| SnSO <sub>4</sub> .7H <sub>2</sub> O | 0.4078 g         | 0.1966 g | 0.2890 g | 0.20933 g | 0.1964 g  |
| Boric acid                           | 4.6380 g         | 4.6380 g | 4.6380 g | 4.6380 g  | 4.6380 g  |
| NaCl                                 | 4.1160 g         | 4.1160 g | 4.1160 g | 4.1160 g  | 4.1160 g  |
| Sodium gluconate                     | 30.000 g         | 30.000 g | 30.000 g | 30.000 g  | 30.000 g  |
| Peptone                              | 0.0050 g         | 0.0050 g | 0.0050 g | 0.0050 g  | 0.0050 g  |

EDS spectra and elemental maps of MEA films:

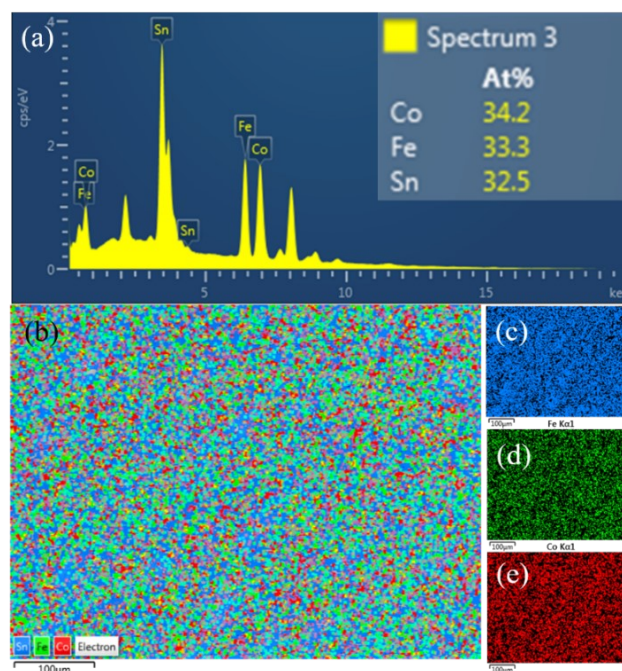

Figure S1. (a) Typical EDS spectra of CFS alloy, elemental map of (b) Co:Fe:Sn:34.2:33.3:32.5, (c) Sn, (d) Fe, (e) Co film.

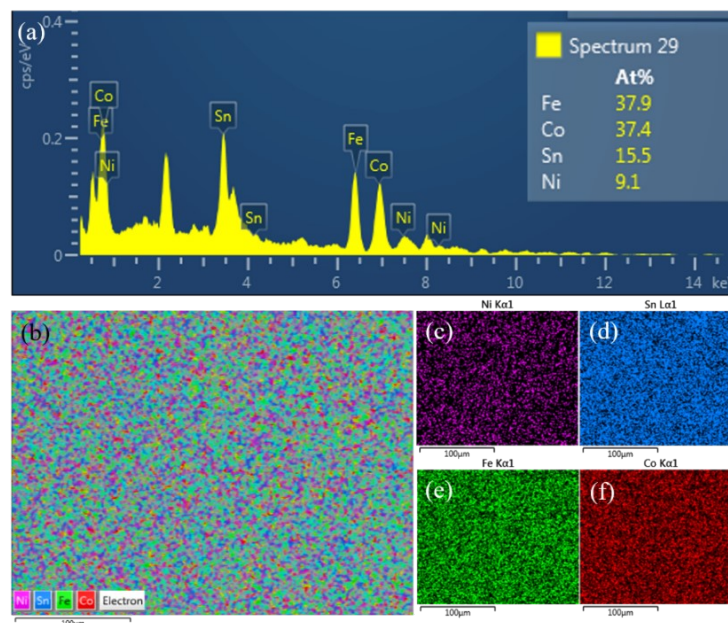

Figure S2. (a) Typical EDS spectra of CFSN-1 alloy, elemental map of (b) Co:Fe:Sn:Ni:37.4:37.9:15.5:9.1, (c) Ni, (d) Sn, (e) Fe, and (f) Co film.

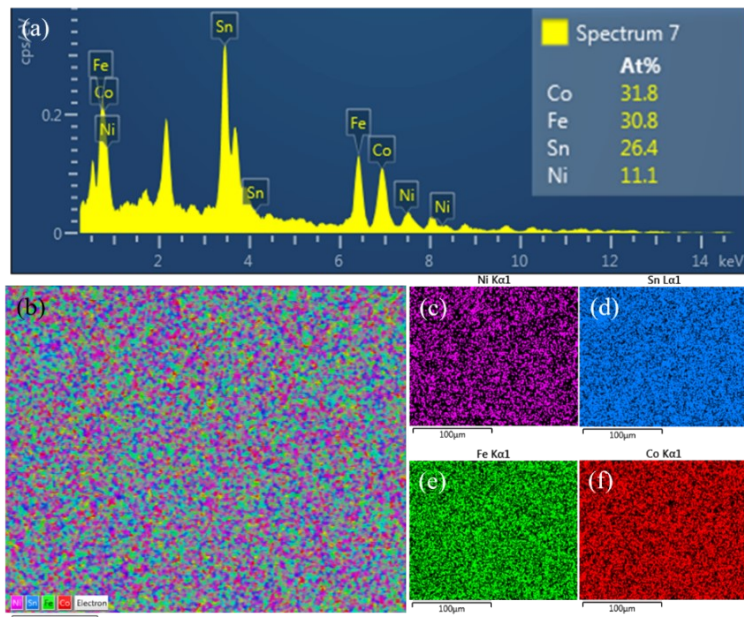

Figure S3. (a) Typical EDS spectra of CFSN-2 alloy, elemental map of (b) Co:Fe:Sn:Ni:31.8:30.8:26.4:11.1, (c) Ni, (d) Sn, (e) Co, and (f) Fe film.

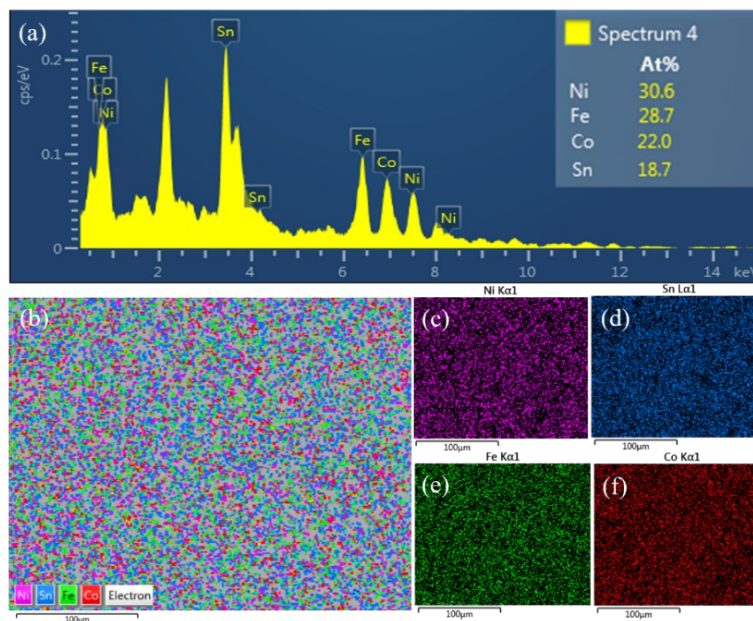

Figure S4. (a) Typical EDS spectra of CFSN-3 alloy, elemental map of (b) Co:Fe:Ni:Sn::22.0:28.7:30.6:18.7, (c) Ni, (d) Sn, (e) Fe, and (f) Co film.

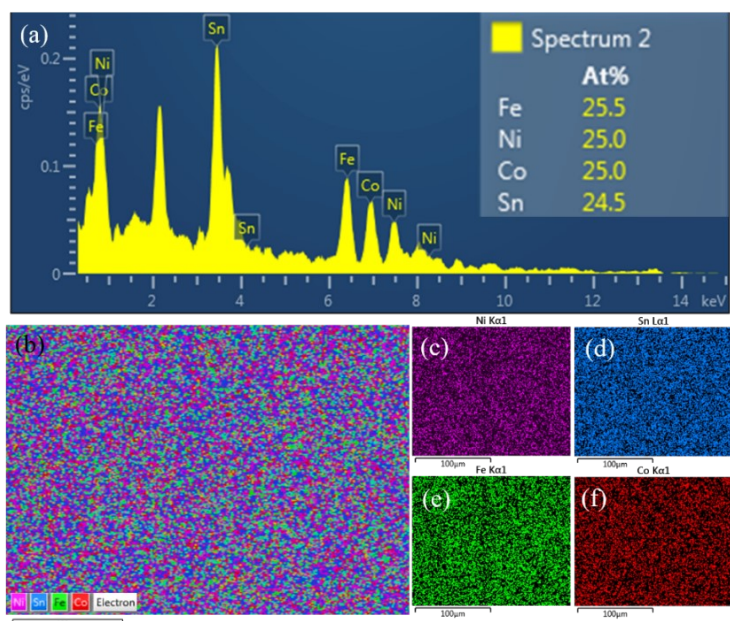

Figure S5. (a) Typical EDS spectra of CFSN-4 alloy, elemental map of (b) Co:Fe:Ni:Sn:25.0:25.5:25.0:24.5, (c) Ni, (d) Sn, (e) Fe, and (f) Co film.

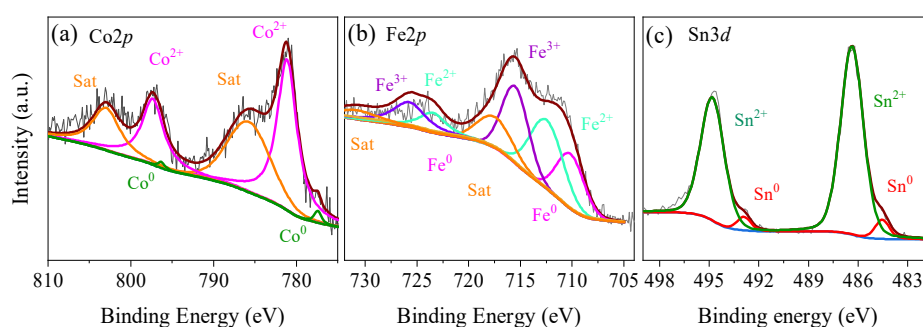

Figure S6. XPS spectra of the CFS MEA film showing the deconvoluted core-level peaks of (a) Co 2*p*, (b) Fe 2*p*, and (c) Sn 3*d*.

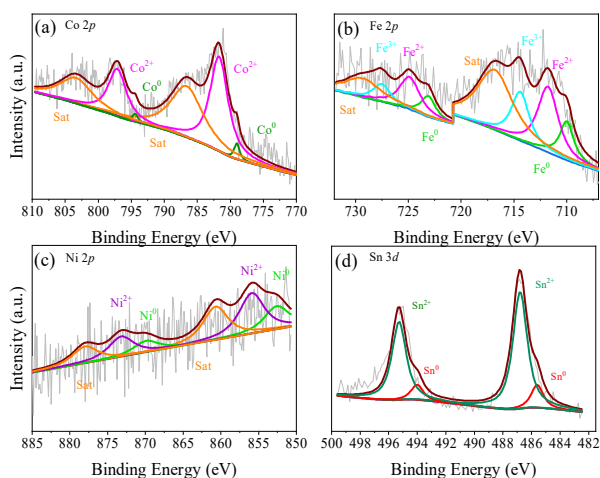

Figure S7. XPS spectra of the CFNS-1 MEA film showing the deconvoluted core-level peaks of (a) Co 2*p*, (b) Fe 2*p*, (c) Ni 2*p*, and (d) Sn 3*d*.

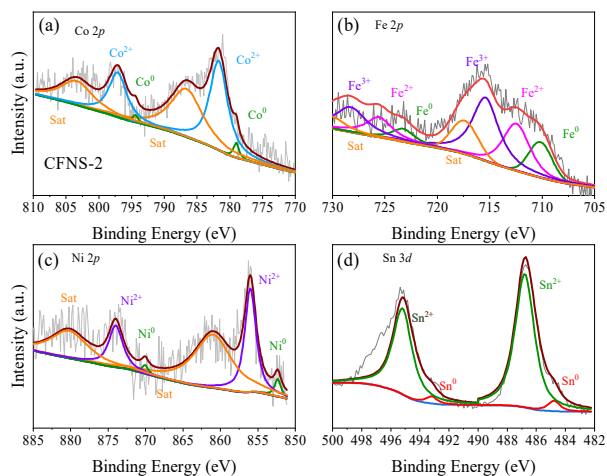

Figure S8. XPS spectra of the CFNS-2 MEA film showing the deconvoluted core-level peaks of (a) Co 2*p*, (b) Fe 2*p*, (c) Ni 2*p*, and (d) Sn 3*d*.

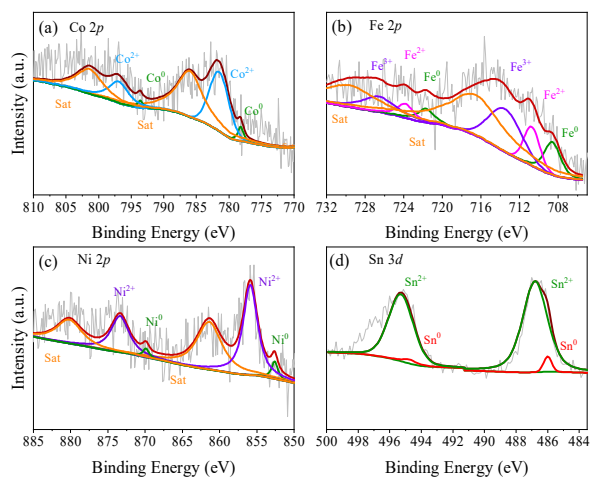

Figure S9. XPS spectra of the CFNS-2 MEA film showing the deconvoluted core-level peaks of (a) Co 2*p*, (b) Fe 2*p*, (c) Ni 2*p*, and (d) Sn 3*d*.

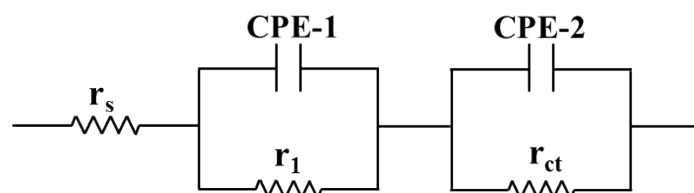

Figure S10. Equivalent circuit used for EIS analysis.

The long-term stability of the catalysts toward the HER was investigated using chronoamperometry at different current densities over a duration of 10 h (Figure S11). All samples exhibit stable current density responses over time, indicating good electrochemical durability under continuous HER operation.

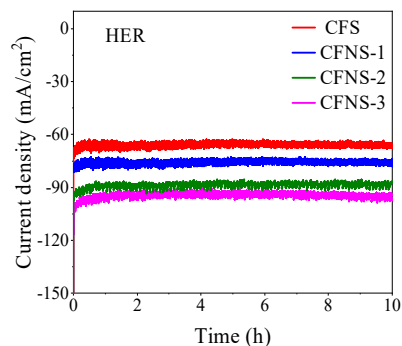

Figure S11. HER chronoamperometry-based stability curve of CFS, CFNS-1, CFNS-2, and CFNS-3 MEA films.

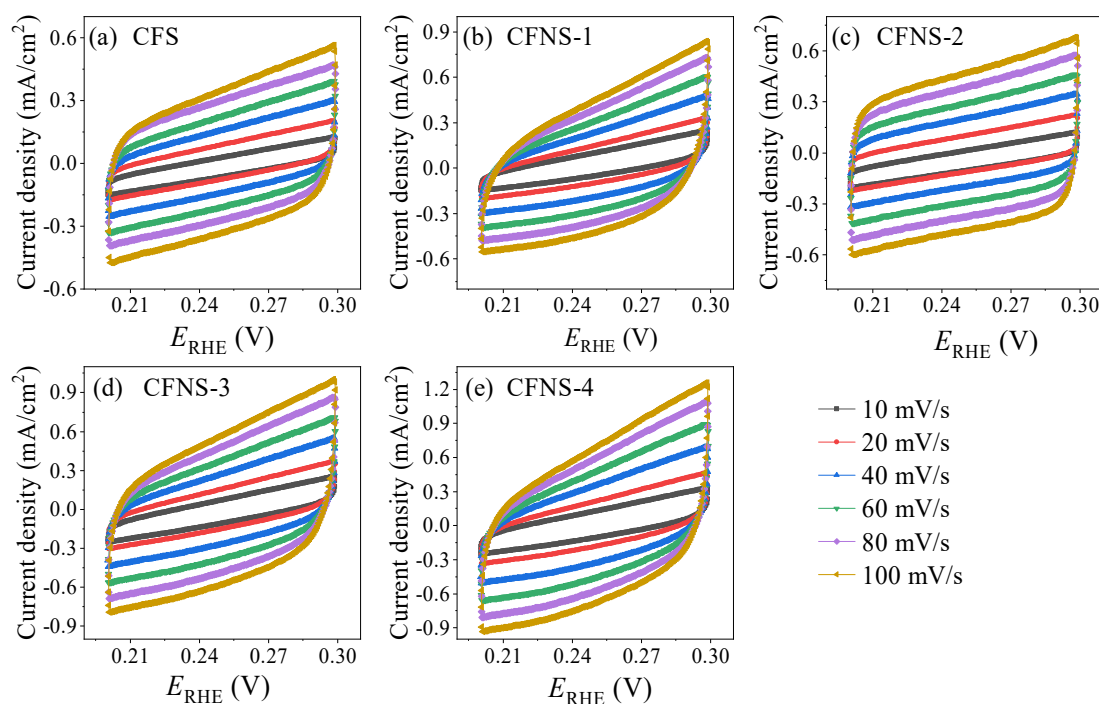

Figure S12. CV scans recorded in the non-Faradic region for (a) CFS, (b) CFNS-1, (c) CFNS-2, (d) CFNS-3, and (e) CFNS-4 MEA films.

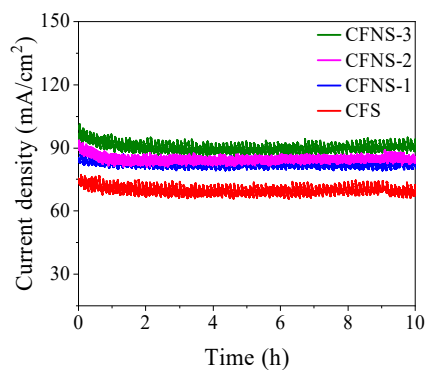

Figure S13. OER chronoamperometry-based stability curve of CFS, CFSN-1, CFSN-2, and CFSN-3 MEA films.

To understand the effect of catalytic activity on the structural changes of the MEA films, Ex-situ XRD patterns were recorded before and after HER and OER measurements. Comparison of Figure S14(a) before catalytic activity, (b) after HER, and (c) after OER clearly show that there are no additional peaks in the XRD patterns recorded before and after the electrochemical studies. This confirms the absence of any significant structural changes in the MEA films after the electrochemical studies.

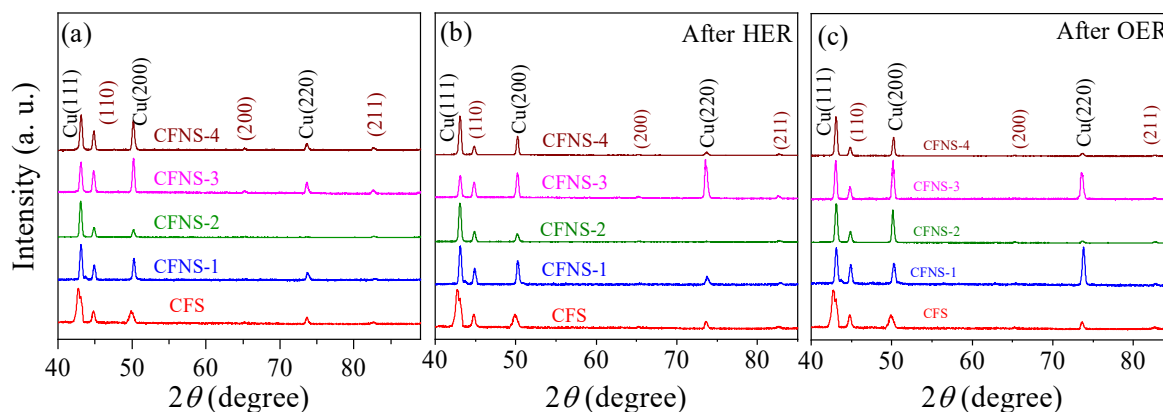

Figure S14. XRD patterns of CFS, CFNS-1, CFNS-2, CFNS-3, and CFNS-4 after (a) before catalytic activity (b) HER and (c) OER, demonstrating the structural stability of the bcc-like phase under electrochemical conditions.

Table S2. Comparison of overpotential at 10 mA/cm<sup>2</sup> ( $\eta_{10}$ ), various alloy electrocatalysts for HER in 1.0 M KOH.

| Catalyst              | Overpotential (mV) | Tafel slope (mV/dec) | Reference |
|-----------------------|--------------------|----------------------|-----------|
| CFNS-4                | 100.3              | 46.7                 | This work |
| CFNS-3                | 114.6              | 52.8                 |           |
| CFNS-4                | 123.7              | 54.4                 |           |
| CFNS-3                | 133.8              | 64.3                 |           |
| CFS                   | 154.8              | 71.2                 |           |
| NiCoCr                | 205                | 159                  | [1]       |
| NiCoV                 | 232                | 169                  |           |
| NiCo(CrV)             | 119                | 105                  |           |
| NiCo(CrV) - 1 $\mu$ m | 87                 | 96                   |           |
| FeCoNi                | 333                | 305.8                | [2]       |
| FeCoNiPt              | 144                | 167.1                |           |
| FeCoNiRu              | 316                | 216.1                |           |
| FeCoNiPtRu            | 321                | 159.4                |           |
| NiMnGaCu (A)          | 230                | 200                  | [3]       |
| NiMnGaCu (M)          | 150                | 193                  |           |
| CuCrP                 | 306                | 136                  | [4]       |
| CuCrFeP               | 334                | 158                  |           |
| CuCrFeNiP             | 263                | 129                  |           |
| CuCrFeNiCoP           | 195                | 118                  |           |
| NiFeMoCoCr            | 172                | 66                   | [5]       |

Table S3. Charge transfer resistance values of MEA films in HER and OER

| Sample Id | $r_{ct}$ ( $\Omega$ ) for HER | $r_{ct}$ ( $\Omega$ ) for OER |
|-----------|-------------------------------|-------------------------------|
| CFS       | 11.6                          | 20.867                        |
| CFNS-1    | 9.2                           | 16.839                        |
| CFNS-2    | 6.1                           | 12.477                        |
| CFNS-3    | 4.5                           | 8.5583                        |
| CFNS-4    | 3                             | 6.6877                        |

Table S4. Comparison of overpotential at 10 mA/cm<sup>2</sup> ( $\eta_{10}$ ), various alloy electrocatalysts for OER in 1.0 M KOH.

| Catalyst                    | Overpotential (mV) | Tafel slope (mV/dec) | Reference |
|-----------------------------|--------------------|----------------------|-----------|
| CFNS-4                      | 319.7              | 55.5                 | This work |
| CFNS-3                      | 326.5              | 56.3                 |           |
| CFNS-4                      | 338.1              | 56.7                 |           |
| CFNS-3                      | 349.7              | 66.1                 |           |
| CFS                         | 363.7              | 68.7                 |           |
| NiCoCr                      | 369                | 82                   | [1]       |
| NiCoV                       | 361                | 75                   |           |
| NiCo(CrV)                   | 350                | 72                   |           |
| NiCo(CrV) - 1 $\mu\text{m}$ | 320                | 69                   |           |
| FeCoNi                      | 356                | 57.3                 | [2]       |
| FeCoNiPt                    | 345                | 52.2                 |           |
| FeCoNiRu                    | 314                | 51                   |           |
| FeCoNiPtRu                  | 331                | 50                   |           |
| NiMnGaCu (A)                | 200                | 176                  | [3]       |
| NiMnGaCu (M)                | 280                | 126                  |           |
| CuCrP                       | 383                | 111.4                | [4]       |
| CuCrFeP                     | 376                | 94.9                 |           |
| CuCrFeNiP                   | 296                | 108.6                |           |
| CuCrFeNiCoP                 | 270                | 70.7                 |           |

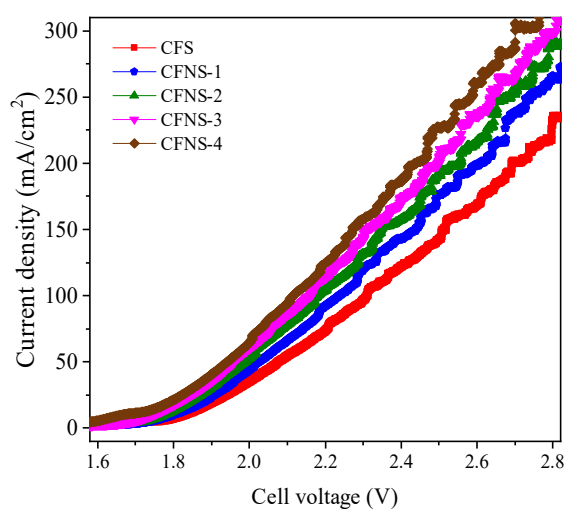

Figure S15. LSV curve for overall water splitting of all the MEA films recorded using a two-electrode configuration.

## References

- [1] S. Ahmad, M. Egilmez, W. Abuzaid, F. Mustafa, A. M. Kannan, A. S. Alnaser, *Int. J. Hydrog. Energy* 52 (2024) 1428-1439.
- [2] M. Geng, Y. Zhu, J. Guan, R. Zhang, Q. Zou, L. Wang, B. Guo, M. Zhang, *J. Alloys Compd.* 1005 (2024) 176180.
- [3] M. Tiwari, P. K. Bhartiya, N. Bangruwa, S. K. Sarkar, D. Mishra, *ACS Appl. Mater. Interfaces* 16 (2024) 69398–69409.
- [4] T. Zhang, J. Li, B. Zhang, G. Wang, K. Jiang, Z. Zheng, J. Shen, *J. Alloys Compd.* 969 (2023) 172439.
- [5] G. Zhang, K. Ming, J. Kang, Q. Huang, Z. Zhang, X. Zheng, and X. Bi, *Electrochim. Acta* 279 (2018) 19-23.

\*\*\*\*\*
